# Supplementary material
Source: PubMed Central journal article supplement (PMC10938055)
Supplement: NIHMS1970355-supplement-AB518CF5FA511E5BCF708751DC24A99B.pdf [file NIHMS1970355-supplement-AB518CF5FA511E5BCF708751DC24A99B.pdf]

# **A novel genetic variant in *PTGS1* affects N-glycosylation of cyclooxygenase-1 causing a dominant–negative effect**

Verónica Palma-Barqueros *et al.*

## **Supplemental Material**

### **Patients, blood sampling, and DNA collection**

The proband was a 13-year-old teen from Asiatic origin adopted by a Spanish family, who was enrolled in the Spanish multicenter project “Functional and Molecular Characterization of Patients with Inherited Platelet Disorders”.<sup>1,2</sup> This project followed the Helsinki Declaration and had the approval of the Ethics Committees of the Instituto de Investigación Biomédica (IBSAL, Salamanca, Spain) and Hospital Universitario Reina Sofía (Murcia, Spain). The patient, and control subjects, provided written informed consent. Clinical data were reviewed by the investigator team and bleeding symptoms were scored using ISTH bleeding assessment tool (ISTH-BAT).<sup>3,4</sup>

Venous blood was drawn into either 7.5% K3 EDTA tubes (for complete blood counts [CBC] and DNA purification) or buffered 0.105 M sodium citrate (for functional studies). CBC were performed using a Sysmex® XS1000i hematological counter (Sysmex España, Spain). DNA was isolated using a DNeasy blood and tissue kit, (Qiagen, Germany) and quantified using a Qubit 2.0 fluorometer (ThermoFisher Scientific, CA, USA).

### **Molecular analysis by HTS gene panel and Sanger sequencing**

The patient DNA was analysed by high-throughput sequencing (HTS)-gene panel using a MiSeq Illumina platform (Illumina, CA, USA).<sup>2,5</sup> The identified genetic variants were assessed according to the standards of the American College of Medical Genetics and Genomics and the Association for Molecular Pathology (ACMG).<sup>6</sup> The *PTGS1* variant identified in the index case by HTS-gene panel<sup>2</sup> was confirmed by means of Sanger sequencing in an ABI 3130 automated sequencer. The following specific forward and reverse primers were designed using Primer3 (<http://bioinfo.ut.ee/primer3/>)

*PTGS1* 5F: ctgtcaccggtatttttgctctct

*PTGS1* 5R: atctgtaaagacccaacacagaga

Genomic DNA was amplified with the Fast Start High Fidelity PCR System (Roche, Basel, Switzerland) following the manufacturer's instructions, with some variations in the annealing temperature. DNA sequences were evaluated using Chromas Lite v2.1.1 (Technelysium, South Brisbane, Australia) and DS Gene v1.5 (Accerlys, San Diego, CA) software. Data were analyzed using annotations of genome version hg19/GRCh37. COX-1 sequence alignment with 12 species was done by using Uniprot and visualized with Jalview software.<sup>7</sup> The new human COX-1 crystal structure (<https://www.rcsb.org/structure/6Y3C>) was visualized in the Chimera software (UCSF, CA, USA).

### **Platelet aggregation**

Platelet-rich-plasma (PRP) and platelet poor plasma (PPP) from citrate whole blood were prepared by stepwise centrifugation (140 × g, 15 min; 1000 × g, 10 min, respectively). Light transmission aggregometry (LTA) in PRP (2 × 10<sup>11</sup> platelets/L) was performed as described<sup>1</sup> by using an Aggrecoorder II aggregometer (Menarini Diagnostics, Florence, Italy). Time course changes in the maximal percentage of light transmission of PRP over baseline PPP were recorded for 300 seconds upon stimulation with the following platelet agonists: 1.6 mM arachidonic acid [AA; Sigma-Aldrich, UK], 10 μM ADP [Chronolog, UK], 10 μg/ml Collagen [Nycomed, Austria], 25 μM protease-activated receptor agonist peptide (PAR1p) (TRAP-6; Bachem, Austria), 10 μM U46619 (Cayman Chemical, UK) and 1.25 mg/mL Ristocetin [Helena Bioscience, UK]

### **Platelet flow cytometry**

Platelet expression of membrane glycoproteins (GPs) GPIa (integrin α<sub>2</sub>, CD49b), GPIbα (CD42B), GPIX (CD42Aa), GPIIb (integrin subunit α<sub>IIb</sub>, CD41a), GPIIIa (β<sub>3</sub>, CD61) and GPVI was evaluated by flow cytometry in citrated whole blood diluted 1:10 in sterile phosphate-buffered saline (PBS) using specific antibodies (all from BD Biosciences, Madrid, Spain). To analyze platelet granule secretion and α<sub>IIb</sub>β<sub>3</sub> activation, diluted PRP (~20 × 10<sup>9</sup>/L platelets) was incubated under static conditions (30 minutes at room temperature [RT]) with Tyrode's buffer, as control for non-stimulated platelets, or with agonists in the presence of anti-CD41\*APC (as a platelet marker), fibrinogen-Alexa488 (Thermo Fisher, Madrid, Spain) and anti-CD62\*PE (α-granule secretion) or anti-

CD63\*PE (dense granule secretion) (BD Biosciences). Reactions were stopped with 4% paraformaldehyde (PFA) (v/v) (15 min, RT), samples were diluted with PBS and then run in a BD Accuri™ C6 device (BD Biosciences, Ann Arbor, MI, USA). The median fluorescence intensity (MFI) of CD41a positively stained cells (platelets) was analysed using BD Accuri™ C6 software<sup>8</sup>.

### **Platelet TXB<sub>2</sub> synthesis**

LTA assays were stopped by adding 100 µmol/L diclofenac sodium (Sigma-Aldrich, UK) and 100 U/mL heparin (Leo Laboratories, UK). Samples were centrifuged (500 x g, 2 min) and supernatants were collected and stored at -80°C until TXB<sub>2</sub> measurement by ELISA (Cayman Chemical, MI, USA).

### **Eicosanomic profile in whole blood**

Citrated whole blood was incubated with phosphate buffered saline (PBS), collagen (30 µg/mL) or PAP1p-6 (25µM) (37°C, 30 min) under stirring conditions in the aggregometer. Stimulation was ended with 100 µmol/L diclofenac sodium (Sigma-Aldrich, UK) and 100 U/mL heparin (Leo Laboratories, UK). Plasma supernatants (2000 x g, 5 min) were collected and stored frozen until use for total eicosanoids measurement by gas chromatography–tandem mass spectrometry as described elsewhere.<sup>9,10</sup> Briefly, after extraction with ethyl acetate, samples were passed through Maestro A columns (Tecan, Switzerland) under gravity flow, columns were washed with acetonitrile, samples were dried by vacuum centrifugation at 37°C and reconstituted in 30% ethanol. Platelet eicosanoids were then separated by reverse-phase HPLC on a 1 x 150 mm, 5 µm Luna C18 (2) column (Phenomenex, CA, USA) and quantified using an MDS Sciex API 3000 triple quadrupole mass spectrometer (Applied Biosystems-ThermoFisher Scientific) with negative-mode electrospray ionization and multiple reaction monitoring.

### **Immunofluorescence studies in platelets and leukocytes**

The immunostaining of platelets and leukocytes was performed essentially as described before.<sup>11</sup> Briefly, platelet-rich-plasma was fixed with 4% paraformaldehyde in PBS at room temperature for 15 min. Then, platelets were washed with PBS-ACD (22.0 g/L citric acid, trisodium salt, dihydrate; 7.3 g/L citric acid, anhydrous; and 24.5

g/L D-(+)-Glucose), (pH 6.1, ) and resuspended in 1% BSA (Sigma-Aldrich). For leukocyte analysis, the interface between PRP and red blood cells was separated, Lyse/Fix solution (BD Bioscience, Germany) was added and leukocytes were isolated by centrifugation (2000 x g, 5 min) and diluted in saline. Platelets or leukocytes were spotted onto glass coverslips at 37°C for 90 min and then blocked with the blocking buffer (0.2% Triton X-100, 2% donkey serum and 1% BSA) for 60 min. Following this, cells were incubated with anti-COX-1 (Cell Signaling Technology, UK; 4841S; 1:100), anti- $\alpha$ -tubulin (Sigma-Aldrich, T5168; 1:200) and anti-CD45 (Abcam, UK, ab8216; 1:200) antibodies overnight.

Cells were washed and incubated for 60 minutes with Alexa 647-conjugated secondary antibody (donkey anti-rabbit polyclonal IgG H+L; Life Technologies; A-31573; 1:500) and Alexa 488-conjugated secondary antibody (donkey anti-mouse polyclonal IgG H+L; Life Technologies; A-21202; 1:500) to detect COX-1,  $\alpha$ -tubulin and CD45, respectively. Samples were incubated with DAPI (25  $\mu$ g/mL; Life Technologies) for 10 minutes to stain leukocyte nuclei. The coverslips were then mounted onto glass slides and visualized with oil immersion objectives (CFI Plan Apochromat 40X, N.A.1.4, working distance 0.26 mm – 63x for platelets and 40x for leukocytes) on a confocal laser scanning microscope (LSM 880 with Airyscan, Zeiss, UK). Acquisition and image processing were performed using the ZEN software (Version 2.35spi, Zeiss) and ImageJ (Version 1.51a, National Institutes of Health, USA)

### **Cell models for mutant COX-1**

To assess the effect of COX-1 genetic variants we established HEK 293T and HEK 293 cells models. These cells were selected as they hardly express COX-1.<sup>12</sup> pcDNA3.1+/C-(K)-DYK vectors containing wild-type or mutant (c.428A>G [p.Asn143Ser]) cDNA of *PTGS1* were commercially available (OHu14933D, Genscript). A Ser145Ala construct was prepared by PCR-based site-directed mutagenesis on the commercial pcDNA3.1 wild-type vector, by using the Stratagene QuikChange Site-Directed Mutagenesis kit with appropriate primers as described.<sup>13</sup>

HEK 293T or HEK 293 cells (ATCC, LGC Standards S.L.U. Spain) were grown in Dulbecco's modified Eagle's medium (DMEM) containing 10% fetal bovine serum.

HEK 293 T cells (2 x 10<sup>5</sup> /well) were transiently transfected with vectors expressing wild-type or mutant (p.Arg143Ser or p.Ser145Ala) COX-1 using Lipofectamine 3000

(ThermoFisher Scientific). Comparable transfection efficiencies in either condition were ensured by flow cytometry measurement of intracellular levels of recombinant COX-1 using the BD IntraSure kit (BD Biosciences) and the antibody  $\alpha$ -DYKDDDDK\*PE (BioLegend, CA, USA, Cat#637309).

HEK 293 cells ( $2 \times 10^5$  /well) were transfected with vectors expressing wild-type (Asn143) or Ser143 mutant COX-1 as above, also containing the neomycin resistance gen. Cells were grown in a geneticin (G418, ThermoFisher Scientific) containing media for 20 days. Resistant and stable transfected cell clones were isolated and grown separately. Finally, cells expressing either the wild-type or the Ser143 mutant COX-1 were transiently transfected with different amounts of vector (0.25-3  $\mu$ g) expressing the alternative COX-1 protein.

In either case, at 48h post-transfection, cells were washed with PBS and split for the stimulation experiment and for preparation of protein lysates. In stimulation experiments, cells ( $25 \times 10^4$  for each transfection condition) were incubated with PBS or 500  $\mu$ M AA for 30min at 37 °C, centrifuged (5 min, 1000 x g) and the supernatants were recovered and stored frozen at -80°C until TXA<sub>2</sub> determination by ELISA (Cayman Chemical).

### **Western blot analysis**

Standard western blotting procedures were used.<sup>8</sup> Briefly, washed platelets ( $1 \times 10^9$  platelets/mL) were resuspended in modified Tyrode's HEPES buffer (134 mmol/L NaCl, 2.9 mmol/L KCl, 0.34 mmol/L Na<sub>2</sub>HPO<sub>4</sub>, 12 mmol/L NaHCO<sub>3</sub> and 1 mmol/L MgCl<sub>2</sub> and 20mmol/L HEPES, pH 7.4; all Sigma, UK), pH 7.4, containing protease inhibitors (cOmplete™ Protease Inhibitor Cocktail, Sigma-Aldrich, UK) were lysed with Triton X-100 (0.5% v/v). Proteins were separated by 8% SDS-PAGE and transferred to polyvinylidene fluoride membranes. Blots, were stepwise incubated with primary antibodies against COX-1 and  $\beta$ -actin (Cell Signaling Technology, cat# 4841S and (Sigma-Aldrich, cat# A3854 respectively) followed by secondary horseradish peroxidase-conjugated goat anti-rabbit IgG antibody (Sigma-Aldrich, cat# 12-348).

Proteins were detected by chemiluminescence (ECL prime; GEHealthcare). For N-glycosylation analysis, lysates from cell transfections were denatured for 5 min at 100°C in 150 mM sodium phosphate buffer, pH 7.4, supplemented with 2% SDS and 1M  $\beta$ -mercaptoethanol.<sup>14</sup> Samples were chilled on ice and digested at 37°C for 15h with

0.6 U N-glycosidase F (PNGase-F, Roche Diagnostics GmbH, Germany) in the presence of 15% Triton X-100. Finally, cell proteins lysates, with or without N-glycosidase F treatment, were separated on 8% SDS-PAGE gels and immunoblotting was carried out as above.

### Statistical analysis

All functional assays were performed in parallel with samples from the patient and from at least one healthy control. Unless specifically stated, statistical comparisons could not be performed because of the limited sample number.

### References

1. Sanchez-Guiu I, Anton AI, Padilla J, et al. Functional and molecular characterization of inherited platelet disorders in the Iberian Peninsula: results from a collaborative study. *Orphanet J Rare Dis.* 2014;9:213.
2. Bastida JM, Lozano ML, Benito R, et al. Introducing high-throughput sequencing into mainstream genetic diagnosis practice in inherited platelet disorders. *Haematologica.* 2018;103(1):148-162.
3. Gresele P, Orsini S, Noris P, et al. Validation of the ISTH/SSC bleeding assessment tool for inherited platelet disorders: A communication from the Platelet Physiology SSC. *J Thromb Haemost.* 2020;18(3):732-739.
4. Rodeghiero F, Tosetto A, Abshire T, et al. ISTH/SSC bleeding assessment tool: a standardized questionnaire and a proposal for a new bleeding score for inherited bleeding disorders. *J Thromb Haemost.* 2010;8(9):2063-2065.
5. Lozano ML, Cook A, Bastida JM, et al. Novel mutations in RASGRP2, which encodes CalDAG-GEFI, abrogate Rap1 activation, causing platelet dysfunction. *Blood.* 2016;128(9):1282-1289.
6. Richards S, Aziz N, Bale S, et al. Standards and guidelines for the interpretation of sequence variants: a joint consensus recommendation of the American College of Medical Genetics and Genomics and the Association for Molecular Pathology. *Genet Med.* 2015;17(5):405-424.
7. Waterhouse AM, Procter JB, Martin DM, Clamp M, Barton GJ. Jalview Version 2--a multiple sequence alignment editor and analysis workbench. *Bioinformatics.* 2009;25(9):1189-1191.
8. Hardy AT, Palma-Barqueros V, Watson SK, et al. Significant Hypo-Responsiveness to GPVI and CLEC-2 Agonists in Pre-Term and Full-Term Neonatal Platelets and following Immune Thrombocytopenia. *Thromb Haemost.* 2018;118(6):1009-1020.
9. Edin ML, Hamedani BG, Gruzdev A, et al. Epoxide hydrolase 1 (EPHX1) hydrolyzes epoxyeicosanoids and impairs cardiac recovery after ischemia. *J Biol Chem.* 2018;293(9):3281-3292.
10. Newman JW, Watanabe T, Hammock BD. The simultaneous quantification of cytochrome P450 dependent linoleate and arachidonate metabolites in urine by HPLC-MS/MS. *J Lipid Res.* 2002;43(9):1563-1578.
11. Kahr WHA, Lo RW, Li L, et al. Abnormal megakaryocyte development and platelet function in Nbeal2(-/-) mice. *Blood.* 2013;122(19):3349-3358.

12. Sood R, Flint-Ashtamker G, Borenstein D, Barki-Harrington L. Upregulation of prostaglandin receptor EP1 expression involves its association with cyclooxygenase-2. *PLoS one*. 2014;9(3):e91018-e91018.
13. Navarro-Fernandez J, Eugenia de la Morena-Barrio M, Martinez-Alonso E, et al. Biochemical and cellular consequences of the antithrombin p.Met1? mutation identified in a severe thrombophilic family. *Oncotarget*. 2018;9(69):33202-33214.
14. de la Morena-Barrio ME, Martinez-Martinez I, de Cos C, et al. Hypoglycosylation is a common finding in antithrombin deficiency in the absence of a SERPINC1 gene defect. *J Thromb Haemost*. 2016;14(8):1549-1560.

**Supplemental Figure 1. The proband's platelet function phenotype**

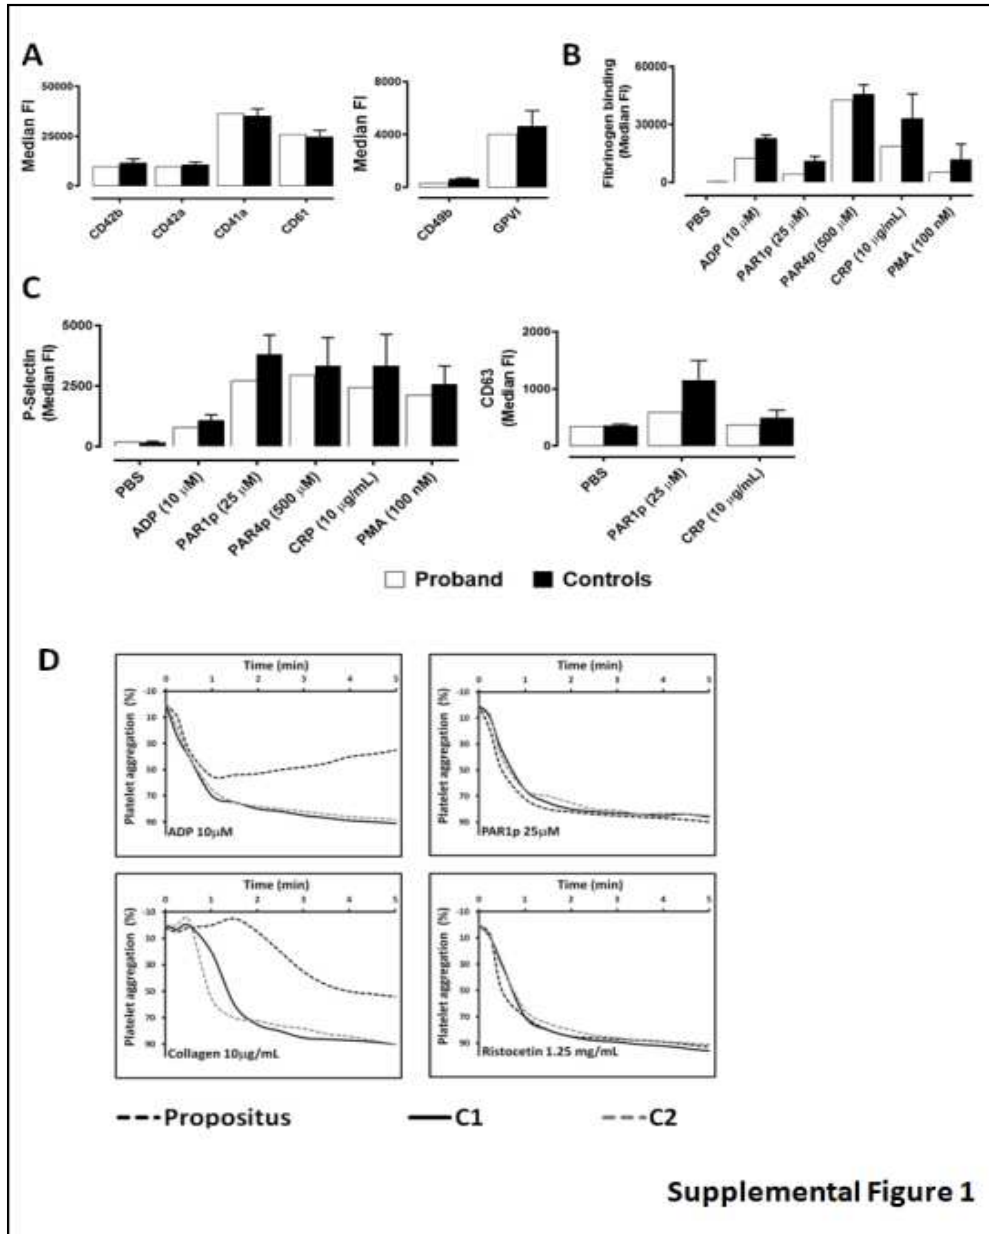

**A)** GPs expression profiles were assessed by flow cytometry in diluted whole blood from the proband and healthy controls (n=2) assayed in parallel. The fluorescently labelled antibodies used are reported in Supplemental Material. Platelets were incubated under static conditions in the presence of PBS or platelet agonists and of fibrinogen-Alexa 488 (**B**), anti-CD62P or CD63 monoclonal antibodies (**C**), to evaluate fibrinogen binding and the release of  $\alpha$ - and  $\delta$ -granules, respectively, by flow cytometry. In A-C graphs the median fluorescence intensity is shown; mean  $\pm$  SD of values in the two controls. **D)** Platelet aggregation in response to the indicated agonists was evaluated in PRP from the index case and two healthy controls (C1 and C2)



Supplemental Figure 2: Thromboxane A<sub>2</sub> release in platelet-rich-plasma and eicosanoid production in whole blood from the proband and time-matched controls.

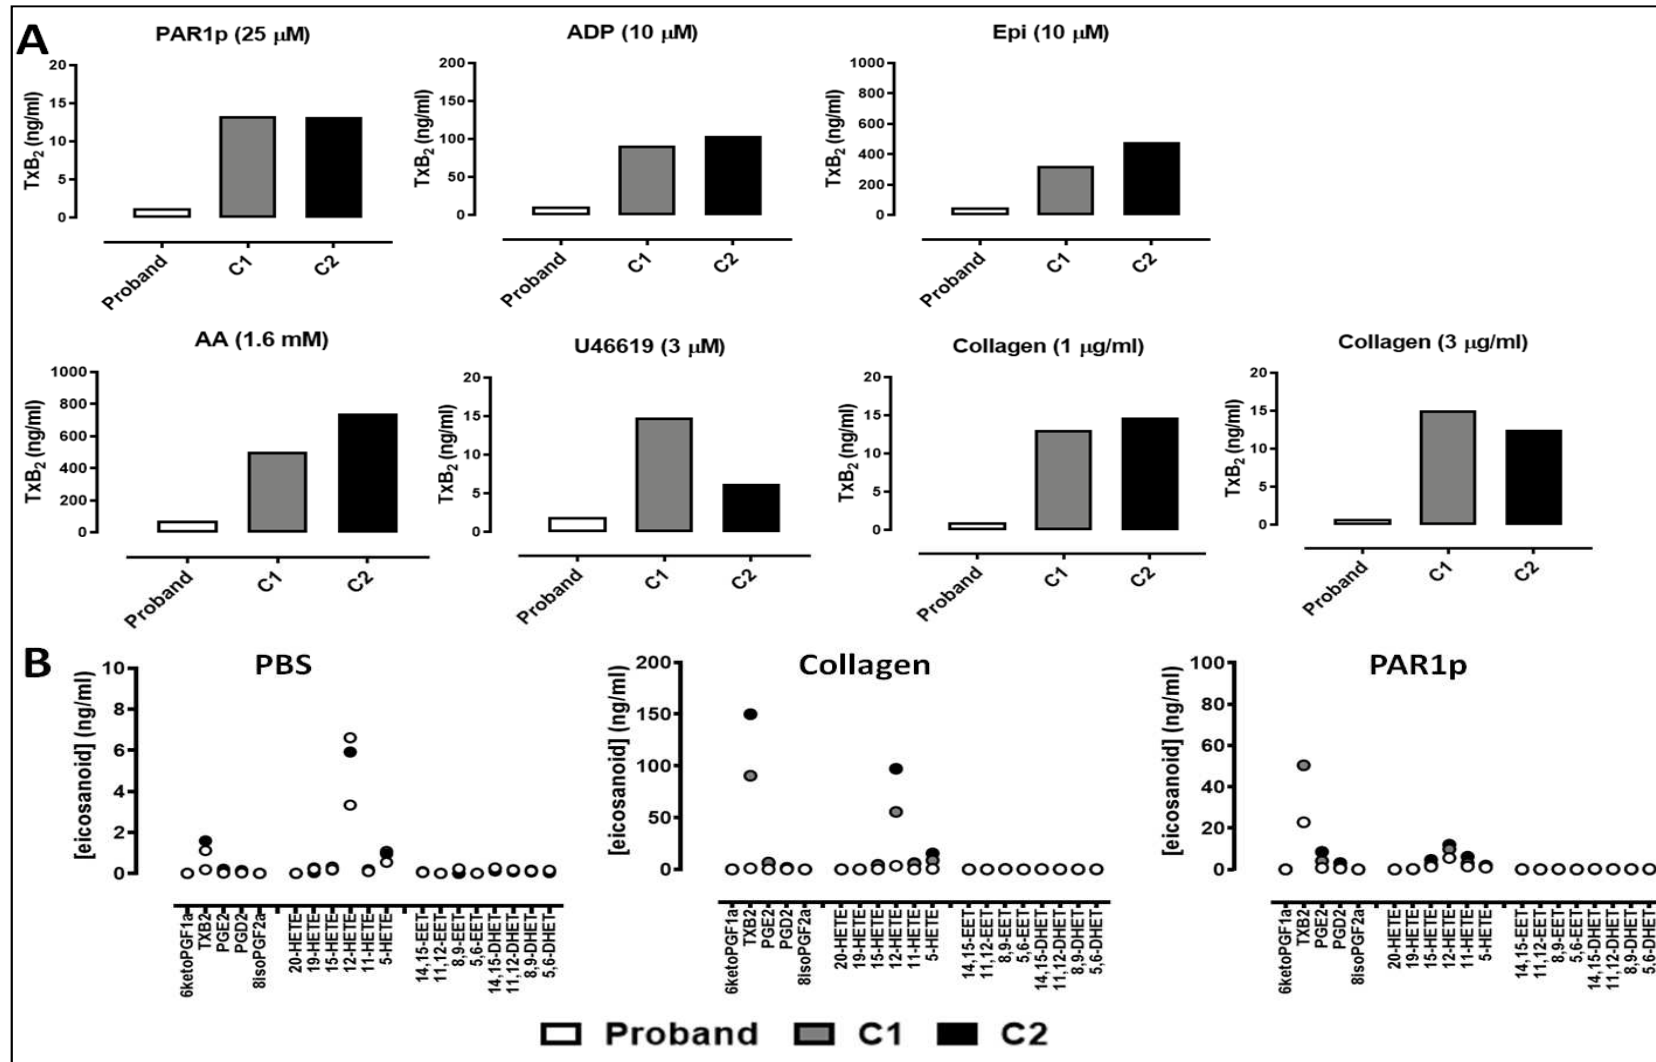

**A**) TXB<sub>2</sub> levels (ng/mL) in supernatants of platelet aggregation reactions from the proband and time-matched controls (C1 and C2) measured by ELISA. **B**) Eicosanoid levels determined by LC-MS in the proband and controls (C1 and C2) whole blood, at basal level (PBS) and following incubation with collagen (30 mg/mL) or TRAP-6 amide (30 μmol/L).

**Supplemental Figure 3. Schematic representation for the conservation of the Asn143 N-glycosylation residue in the Cox-1 sequence and its location in the COX-1 tridimensional structure.**

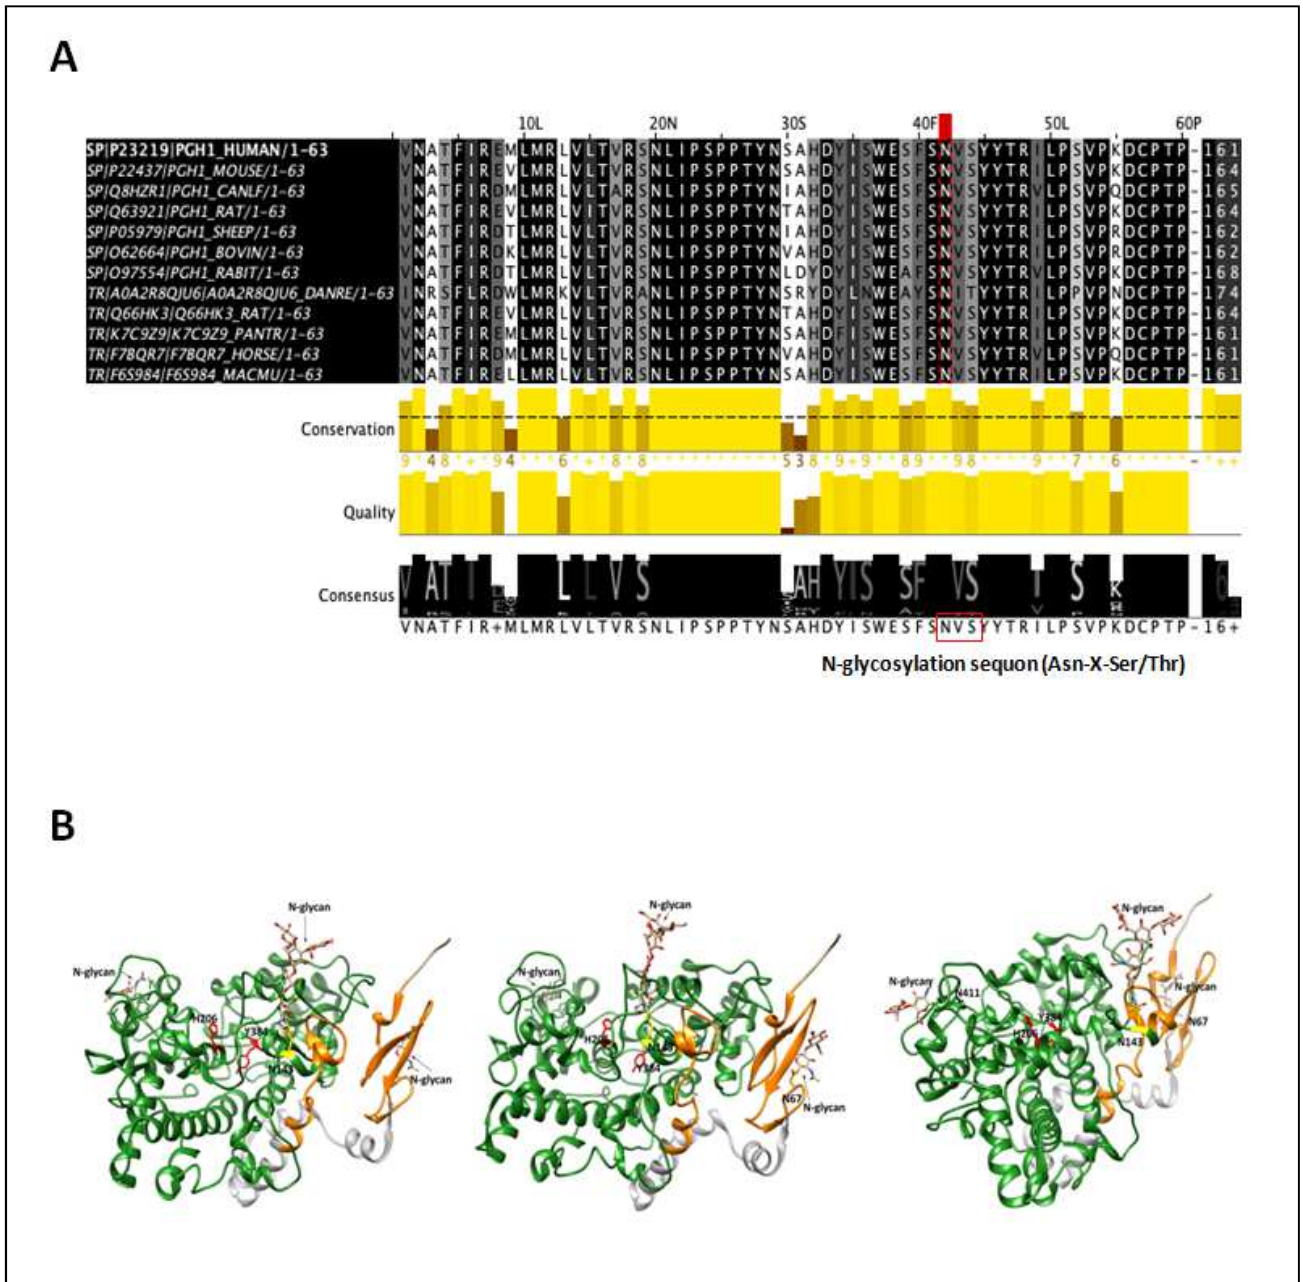

**A)** Amino acid sequence alignment of COX-1 from different species is represented and the mutated residue (in a red square) is conserved among species. The affected sequence is also highlighted. **B)** The tridimensional structure of human wild-type COX-1 protein was visualized by using the crystal by *Scilimati A et al* (PDB:6y3c) (results to be published) in the Quimera software. N-glycosylation residue 143 is shown in yellow; catalytic residues Y384, H205 are shown in red; glycans are marked with arrows; different domains of COX-1 are coloured with the same pattern used in panel A.

Supplemental Figure 4: Immunofluorescence analysis of COX-1 in platelets and leukocytes from the patient with the novel *PTGS1* variant p.Asn143S and time-matched control.

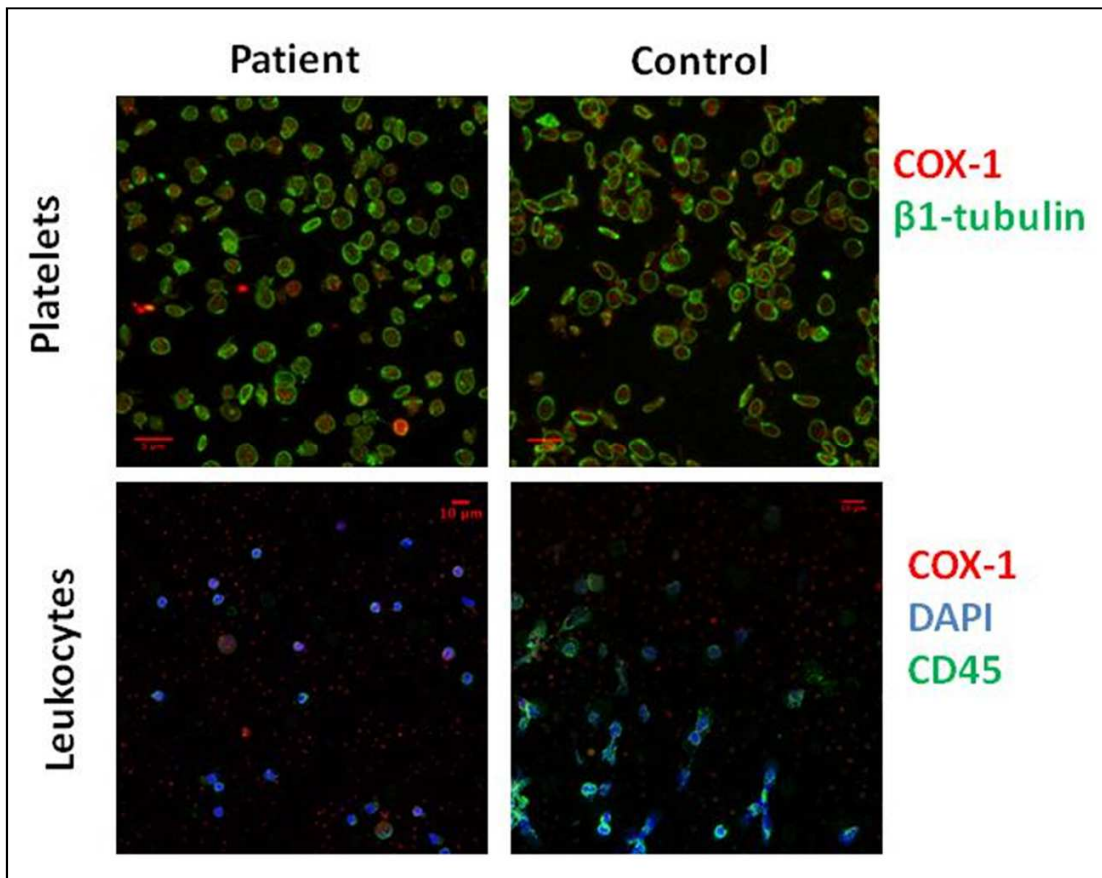

In platelets tubulin is represented in green and COX-1 in red. Leukocytes were identified using CD45 (green), as surface marker, and DAPI (blue) as a nuclear marker, while COX-1 is represented in red. Images were acquired with Airyscan laser scanning confocal microscope. Bars represent 5  $\mu$ m for platelets and 10  $\mu$ m for leukocytes.

**Supplemental Figure 5. The Ser143 COX-1 mutant has a dominant-negative effect on the enzymatic activity of native COX-1.**

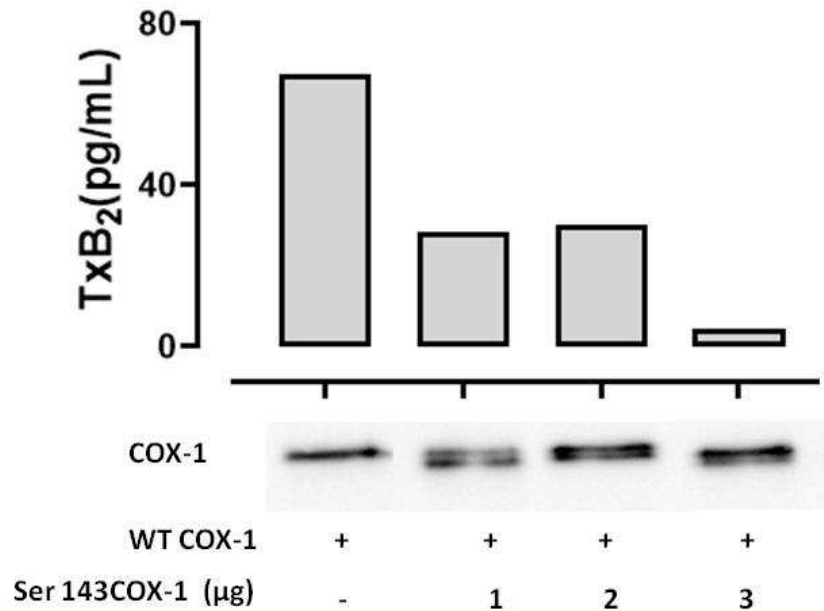

HEK 273 cells were transfected with vector expressing wild-type Asn143 COX-1 and the neomycin resistance gene and grown in the presence of geneticin. Resistant and stable transfected cell clones were isolated and then transfected with different amounts of Ser143 mutant COX-1. Cells were washed and splitted for preparation of protein lysates and for AA (500uM) stimulation and TXA<sub>2</sub> production measurement by ELISA. A double COX-1 protein is seen in co-transfected cells.

**Supplemental Table 1.** Blood parameters and clinical bleeding symptoms in the heterozygous carrier of the novel variant p.Asn143Ser in COX-1

|                            |                                                                                       |
|----------------------------|---------------------------------------------------------------------------------------|
| <b>Age</b>                 | <b>13 yr</b>                                                                          |
| <b>Blood Parameters</b>    |                                                                                       |
| WBC, $\times 10^9/L$       | 5.73                                                                                  |
| RBC, $\times 10^{12}/L$    | 3.89                                                                                  |
| Hb, g/dL                   | 12.2                                                                                  |
| Hct (%)                    | 33.3                                                                                  |
| Platelets, $\times 10^9/L$ | 206                                                                                   |
| MPV, fL                    | 11.4                                                                                  |
| <b>PFA-100 CT (s)</b>      |                                                                                       |
| Collagen/epinephrin        | >300                                                                                  |
| Collagen/ADP               | 120s                                                                                  |
| <b>ISTH-BAT score</b>      | <b>6</b>                                                                              |
| <b>Bleeding symptoms</b>   | -Epistaxis<br>-Easy bruising and petechiae<br>-Menorrhagia<br>-Bleeding after surgery |

WBC=white blood cells; RBC=red blood cells; Hb=hemoglobin; Hct=hematocrit; MPV=mean platelet volume; PFA-100= platelet function analyzer; CT=closure times. ISTH-BAT: International Society on Thrombosis and Haemostasis –Bleeding Assessment tool.

**Supplemental Table 2. Agonist-induced eicosanoid production in whole blood determined by LCMS.** Total eicosanoid levels in whole blood from healthy controls (C1 and C2) or from the proband following incubation with vehicle (PBS), collagen (30 µg/mL) or PAR1p (TRAP-6 amide) (25 µM).

| Metabolite (ng/mL) | Patient |                     |              | C1      |                     |              | C2      |                     |              |
|--------------------|---------|---------------------|--------------|---------|---------------------|--------------|---------|---------------------|--------------|
|                    | PBS     | Collagen (30 µg/mL) | PAR1p (25µM) | PBS     | Collagen (30 µg/mL) | PAR1p (25µM) | PBS     | Collagen (30 µg/mL) | PAR1p (25µM) |
| <b>6ketoPGF1a</b>  | 0.00100 | 0.00367             | 0.00267      | 0.00500 | 0.01533             | 0.00200      | 0.00100 | 0.00867             | 0.02033      |
| <b>TXB2</b>        | 0.19000 | 0.98600             | 22.79667     | 1.11633 | 90.45033            | 50.41900     | 1.58400 | 149.89300           | 113.25867    |
| <b>PGE2</b>        | 0.01433 | 0.03200             | 0.76033      | 0.07967 | 6.74867             | 4.09833      | 0.20433 | 5.82600             | 8.49033      |
| <b>PGD2</b>        | 0.02833 | 0.04367             | 0.43700      | 0.09233 | 1.48867             | 0.94333      | 0.14533 | 1.38967             | 3.12333      |
| <b>8isoPGF2a</b>   | 0       | 0                   | 0            | 0       | 0                   | 0            | 0       | 0                   | 0            |
| <b>20-HETE</b>     | 0       | 0                   | 0            | 0       | 0                   | 0            | 0       | 0                   | 0            |
| <b>19-HETE</b>     | 0.20600 | 0.23233             | 0.19600      | 0.26467 | 0.12200             | 0.16300      | 0.04067 | 0.10967             | 0.10767      |
| <b>15-HETE</b>     | 0.19500 | 0.16033             | 1.40067      | 0.30800 | 3.98867             | 2.41967      | 0.17133 | 4.51300             | 4.63833      |
| <b>12-HETE</b>     | 3.33033 | 3.48100             | 5.57833      | 6.61000 | 55.63067            | 9.77867      | 5.91767 | 97.24267            | 11.97133     |
| <b>11-HETE</b>     | 0.09600 | 0.11467             | 1.45267      | 0.18567 | 5.41400             | 2.99200      | 0.10700 | 6.09967             | 6.19967      |
| <b>5-HETE</b>      | 0.54433 | 0.57367             | 0.88733      | 1.07233 | 8.84433             | 1.53967      | 0.95200 | 15.41467            | 1.88433      |
| <b>14,15-EET</b>   | 0.05000 | 0.06333             | 0.06267      | 0.04800 | 0.03600             | 0.04667      | 0.09200 | 0.05167             | 0.00000      |
| <b>11,12-EET</b>   | 0       | 0                   | 0            | 0       | 0                   | 0            | 0       | 0                   | 0            |
| <b>8,9-EET</b>     | 0.22833 | 0.28867             | 0.13033      | 0.00000 | 0.41633             | 0.22267      | 0.00000 | 0.34500             | 0.08933      |
| <b>5,6-EET</b>     | 0       | 0                   | 0            | 0       | 0                   | 0            | 0       | 0                   | 0            |
| <b>14,15-DHET</b>  | 0.26433 | 0.24933             | 0.25900      | 0.24867 | 0.20900             | 0.20033      | 0.11800 | 0.12733             | 0.13867      |
| <b>11,12-DHET</b>  | 0.17167 | 0.13200             | 0.15500      | 0.18000 | 0.14700             | 0.15667      | 0.08467 | 0.09167             | 0.10200      |
| <b>8,9-DHET</b>    | 0.12233 | 0.14967             | 0.15133      | 0.16567 | 0.12000             | 0.10433      | 0.07133 | 0.04400             | 0.06967      |
| <b>5,6-DHET</b>    | 0.15633 | 0.15467             | 0.19933      | 0.13933 | 0.11067             | 0.12000      | 0.03800 | 0.04167             | 0.06200      |

**Supplemental Table 3. ACMG classification (A) and pathogenicity scores (B) of the p.Asn143Ser variant through different predictors.**

**A**

**Verdict: "Uncertain Significance"**

|                             |                              |       |       |                              |                             |                              |                              |
|-----------------------------|------------------------------|-------|-------|------------------------------|-----------------------------|------------------------------|------------------------------|
| X PVS1                      | X PS1                        | X PS2 | X PS3 | <input type="checkbox"/> PS4 | X PM1                       | <b>√ PM2<br/>Moderate</b>    | <input type="checkbox"/> PM3 |
| X PM4                       | X PM5                        | X PM6 | X PP1 | X PP2                        | <b>√ PP3<br/>Supporting</b> | <input type="checkbox"/> PP4 | X PP5                        |
| X BA1                       | X BS1                        | X BS2 | X BS3 | X BS4                        |                             |                              |                              |
| <b>√ BP1<br/>Supporting</b> | <input type="checkbox"/> BP2 | X BP3 | X BP4 | <input type="checkbox"/> BP5 | X BP6                       | X BP7                        |                              |

**B**

| <b>Computational predictor</b> | <b>Classification</b>    | <b>Score</b> |
|--------------------------------|--------------------------|--------------|
| MutationTaster                 | <b>Disease causing</b>   | 1            |
| Mutation assessor              | <b>Medium</b>            | 3.46         |
| FATHMM                         | <b>Tolerated</b>         | 2.31         |
| FATHMM-MKL                     | <b>Damaging</b>          | 0.9959       |
| FATHMM-XF                      | <b>Damaging</b>          | 0.9037       |
| LRT                            | <b>Deleterious</b>       | 0            |
| DEOGEN2                        | <b>Tolerated</b>         | 0.4877       |
| EIGEN                          | <b>Pathogenic</b>        | 0.9345       |
| EIGEN PC                       | <b>Pathogenic</b>        | 0.8692       |
| SIFT                           | <b>Damaging</b>          | 0.002        |
| SIFT4G                         | <b>Damaging</b>          | 0.004        |
| PROVEAN                        | <b>Damaging</b>          | -4.22        |
| MVP                            | <b>Benign</b>            | 0.8289       |
| REVEL                          | <b>Benign</b>            | 0.546        |
| PrimateAI                      | <b>Damaging</b>          | 0.4489       |
| MetaSVM                        | <b>Tolerated</b>         | -0.6806      |
| MetaLR                         | <b>Tolerated</b>         | 0.1654       |
| Polyphen                       | <b>Probably damaging</b> | 0.997        |
| <b>Allele frequency</b>        | Not reported previously  |              |

ACMG=American College of Medical Genetics; Allele frequency in general population gnomAD browser database (<https://gnomad.broadinstitute.org/>); All the information is available on the web tool (<https://varsome.com/>)

**Supplemental Table 4. Flow cytometry determination of COX-1 expression in HEK 293 T cells transfected with wild-type COX-1 [Asn143], mutant Ser143 or Ala145 COX-1 vectors or co-transfected with wild-type and mutant Ser143 COX-1 vectors [Asn143+Ser143].**

|                      | % + $\alpha$ -DYKDDDDK cells |       |
|----------------------|------------------------------|-------|
|                      | MEAN                         | SD    |
| <b>Asn143</b>        | 48.04                        | 13.06 |
| <b>Ser143</b>        | 50.89                        | 8.18  |
| <b>Asn143+Ser143</b> | 45.76                        | 14.07 |
| <b>Ala145</b>        | 49.5                         | 5.93  |

HEK 293 T cells ( $2 \times 10^5$  /well) were transiently transfected with vectors expressing wild-type or mutant COX-1 using Lipofectamine 3000. Comparable transfection efficiencies in either condition were ensured by flow cytometry measurement of intracellular levels of recombinant COX-1 using the BD IntraSure kit (BD Biosciences) and the antibody  $\alpha$ -DYKDDDDK\*PE. Data show mean % of cell expressing the enzyme.
